# Supplementary material for: Comparative Study of Short-Term Efficacy and Safety of Mitomycin versus Lobaplatin for Hyperthermic Intraperitoneal Chemotherapy after Radical Surgery in Colorectal Cancer with High-Risk Factors for Peritoneal Carcinomatosis: A Propensity Score Matching Analysis
Source: Curr Oncol. 2023 Jan 21;30(2):1488–501. doi: 10.3390/curroncol30020114 (PMC9955354; doi:10.3390/curroncol30020114)
Supplement: Supplementary file 1 [file curroncol-30-00114-s001.zip › curroncol-2121576-supplementary.pdf]

Supplementary Table S1 Definition of CTCAE V5.0 adverse events

| adverse event       | definition                                                                                      | I                                                                                                                                     | II                                                                                                                               | III                                                                                                                        | IV                                                 |
|---------------------|-------------------------------------------------------------------------------------------------|---------------------------------------------------------------------------------------------------------------------------------------|----------------------------------------------------------------------------------------------------------------------------------|----------------------------------------------------------------------------------------------------------------------------|----------------------------------------------------|
| Anemia              | A disease characterized by a decrease in the total amount of hemoglobin in 100 ml of blood      | Hemoglobin < lower limit of normal value ~ 10.0 g / dl<Lower limit of normal value ~ 6.2mmol/l<Lower limit of normal value ~ 100g / L | Hemoglobin < 10.0 ~ 8.0g/dl<6.2 ~ 4.9mmol/L; < 100~ 80g/L                                                                        | Hemoglobin < 8.0g/dl<4.9mmol/L; < 80 g/L; Blood transfusion is needed                                                      | Life threatening; Urgent treatment is needed       |
| Hypoalbuminemia     | The results of laboratory examination showed that the concentration of albumin in blood was low | < lower limit of normal value ~ 3 g / dl<Lower limit of normal value ~ 30 g / L                                                       | <3~2 g/dL; <30~20 g/L                                                                                                            | <2 g/dL; <20 g/L                                                                                                           | Life threatening; Urgent treatment is needed       |
| Myelosuppression    | A disease characterized by decreased hematopoietic function of bone marrow                      | Slightly too few cells or a decrease of $\leq 25\%$ compared with the total number of normal cells in this age group                  | Moderately too few cells or a decrease of $> 25\%$ and $< 50\%$ compared with the total number of normal cells in this age group | Severe cytopenia or reduction of $> 50\%$ and $\leq 75\%$ compared with the total number of normal cells in this age group | The aplastic disorder lasted for more than 2 weeks |
| Wound complications | New abnormalities in the existing wound site                                                    | It can be observed that local treatment is needed                                                                                     | Local care is required                                                                                                           | Surgery is needed                                                                                                          | Life threatening; Urgent treatment is needed       |

|                        |                                                                                      |                                                                  |                                                                                                          |                                                                                                                |                                              |
|------------------------|--------------------------------------------------------------------------------------|------------------------------------------------------------------|----------------------------------------------------------------------------------------------------------|----------------------------------------------------------------------------------------------------------------|----------------------------------------------|
| Abdominal infection    | Abdominal infection                                                                  | -                                                                | Oral administration is required (e.g. antibiotics, antifungal or antiviral drugs)                        | Intravenous antibiotics, antifungal or antiviral drugs are needed; Invasive treatment is needed                | Life threatening; Urgent treatment is needed |
| Pulmonary infection    | Infectious diseases, including pneumonia, occurring in the lungs.                    | -                                                                | Moderate symptoms; Oral medication (antibiotics, antifungal or antiviral drugs) is required              | Intravenous antibiotics, antifungal or antiviral drugs are needed; Invasive treatment is needed                | Life threatening; Urgent treatment is needed |
| Postoperative bleeding | Postoperative disorder characterized by bleeding                                     | The symptoms are mild and need no treatment                      | Moderate bleeding requiring blood transfusion (blood transfusion volume < 2 units (infants < 10cc / kg)) | Blood transfusion volume > 2 units (infants > 10 cc / kg), invasive treatment and hospitalization are required | Life threatening; Urgent treatment is needed |
| Anastomotic leakage    | Rupture of gastrointestinal anastomosis and leakage of contents                      | The diagnostic findings were asymptomatic; No treatment required | Symptomatic; Need treatment                                                                              | Serious; Invasive treatment is needed                                                                          | Life threatening; Urgent treatment is needed |
| Ileus                  | A disease characterized by the inability of the gut to transport intestinal contents | No clinical symptoms, only radiation observation is required     | Symptomatic; Gastrointestinal function changes; fasting                                                  | Severe changes of gastrointestinal function; Total parenteral nutrition is required; Catheterization is needed | Life threatening; Urgent treatment is needed |

---
